# Supplementary material for: Contribution and uncertainty of sectorial and regional emissions to regional and global PM 2.5 health impacts
Source: Copernicus journal article supplement (doi:10.5194/acp-19-5165-2019), 2019-04-16
Supplement: Supplementary file 1 [file acp-19-5165-2019-supplement.pdf]

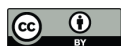

*Supplement of*

## **Contribution and uncertainty of sectorial and regional emissions to regional and global PM<sub>2.5</sub> health impacts**

**Monica Crippa et al.**

*Correspondence to:* Monica Crippa ([monica.crippa@ec.europa.eu](mailto:monica.crippa@ec.europa.eu))

The copyright of individual parts of the supplement might differ from the CC BY 4.0 License.

## **S1 – TM5-FASST methodology**

### **S1.1 – TM5-FASST regions**

Figure S1 shows the 56 regions defined in TM5-FASST. Note that Middle East includes Israel, Jordan, Lebanon, Palestinian Territories and Syria; Rest of South Africa accounts for Lesotho, South Africa and Swaziland, while the Gulf region comprises Bahrain, Iran, Iraq, Kuwait, Oman, Qatar, Saudi Arabia, Yemen; Rest of Central Europe includes Albania, Croatia, Macedonia, Serbia and Montenegro; Rest of South Asia includes Afghanistan, Bangladesh, Bhutan, Nepal and Pakistan; Rest of South Eastern Asia includes Cambodia, Lao People's Democratic Republic and Myanmar. The 56 TM5-FASST regions were chosen to obtain an optimal match with integrated assessment models such as IMAGE (Eickhout et al., 2004; van Vuuren et al., 2007), MESSAGE (Riahi et al., 2007), GAINS (Höglund-Isaksson and Mechler, 2005) as well as the POLES model (Russ et al., 2007; Van Aardenne et al., 2007). The grouping of small countries was motivated by (a) finding a compromise between spatial resolution and computational effort required to obtain the set of source-receptor matrices for TM5-FASST and (b) avoiding inaccurate mapping of small individual countries that are represented by only a few  $1^\circ \times 1^\circ$  grid cells. Most European countries are defined as individual source regions, except for the smallest countries, which have been aggregated.

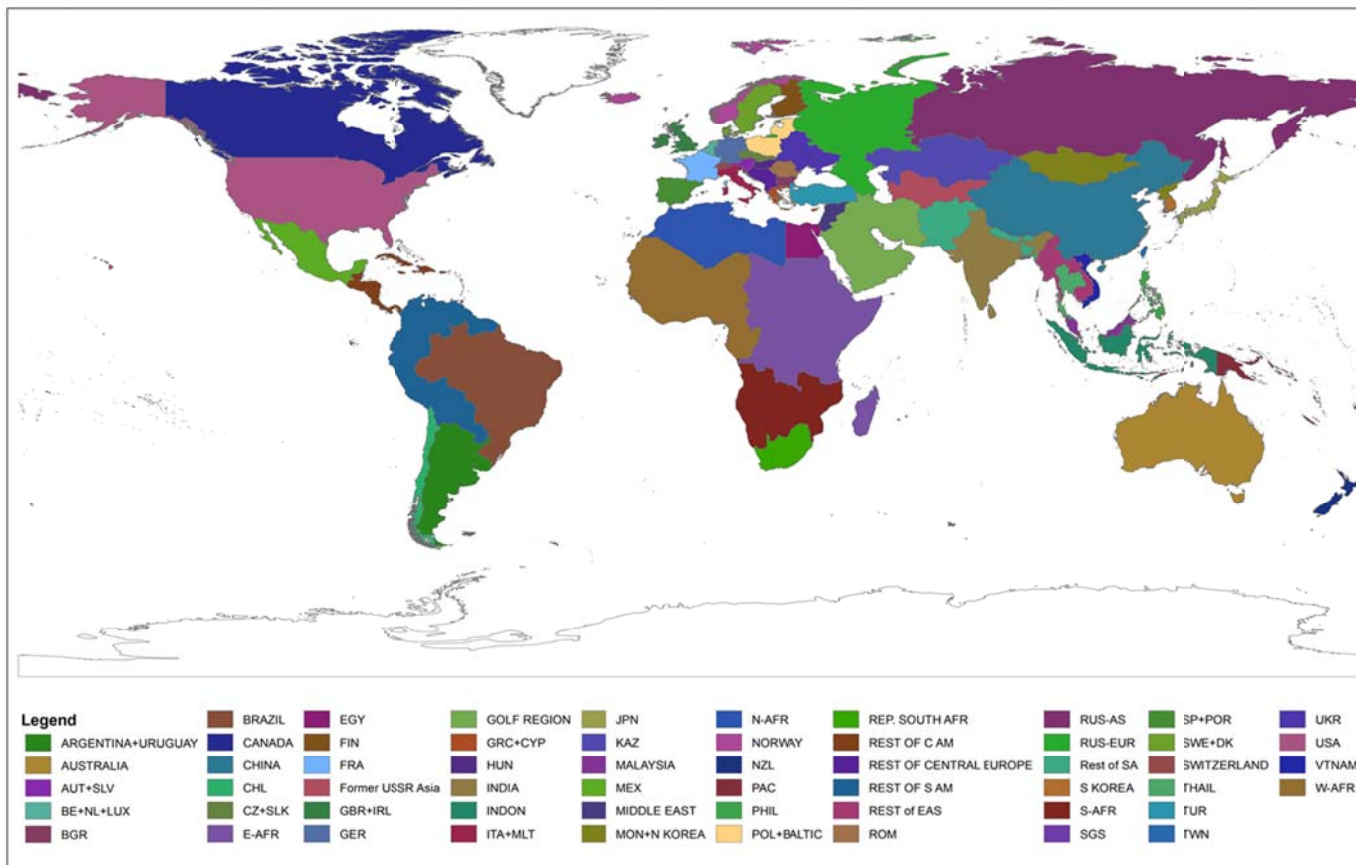

**Figure S1.1 – Global map with the 56 TM5-FASST regions.**

## S1.2 – Sector and source region attribution using the TM5-FASST source-receptor relationships

### S1.2.1 - Attribution by sector

The TM5-FASST methodology uses a local perturbation approach in the vicinity of a reference simulation, where the total concentration of component (or metric)  $j$  in receptor region  $y$ , resulting from emissions of all  $n_i$  precursors  $i$  in all  $n_x$  source regions  $x$ , is obtained as a perturbation on the base-simulation concentration (Van Dingenen et al., 2018). Hence, the  $PM_{2.5}$  concentration in region  $y$  for an emission scenario different from the reference scenario is obtained as:

$$PM(y) = PM_{ref}(y) + \Delta PM(y) \quad (1)$$

The perturbation term  $\Delta PM(y)$  is obtained from the linear scaling of the difference between scenario and reference emission (i.e. the emission perturbation):

$$\Delta PM(y) = \sum_{j=1}^{n_j} \sum_{k=1}^{n_x} \sum_{i=1}^{n_i} A_{ij}[x_k, y] \cdot [E_i(x_k) - E_{i,ref}(x_k)] \quad (2)$$

where the summation runs over  $n_i$  precursor species,  $n_j$   $PM_{2.5}$  components and  $n_x$  source regions, and  $A_{ij}[x_k, y]$  is the source-receptor coefficient, expressing the emission-concentration response sensitivity in the vicinity of the reference conditions, evaluated from a 20% emission perturbation (see Van Dingenen et al., 2018):

$$A_{ij}[x, y] = \frac{\Delta PM_{ref}^j(y)}{\Delta E_{i,ref}(x)} \quad (3)$$

with  $\Delta E_{i,ref}(x) = 0.2 E_{i,ref}(x)$  and  $\Delta PM_{ref}^j(y)$  the corresponding  $PM_{2.5}$  component  $j$  response.

Eq. (2) can also be applied to attribute individual sector contributions to the pollutant concentration by setting the “emission perturbation” equal to the emission contribution of a single sector. The  $PM_{2.5}$  contribution from the single sector  $S$  equals

$$\Delta PM'_S(y) = \sum_{j=1}^{n_j} \sum_{k=1}^{n_x} \sum_{i=1}^{n_i} A_{ij}[x_k, y] \cdot [E_{S,i}(x_k)] \quad (4)$$

Having obtained the marginal  $PM_{2.5}$  contributions from the individual sectors, the total  $PM_{2.5}$  can be re-composed as the sum from all  $n_S$  sectors  $S$ :

$$PM'(y) = \sum_{S=1}^{n_S} \Delta PM'_S(y) \quad (5)$$

However, due to non-linearities in emission-concentration responses, the sum of all individual sector contributions may not exactly match the total  $PM_{2.5}$  obtained from Eqs. (1) and (2) where we write  $E_i(x_k)$  as the sum of the emissions by sector:

$$PM(y) = PM_{base}(y) + \sum_{j=1}^{n_j} \sum_{k=1}^{n_x} \sum_{i=1}^{n_i} A_{ij}[x_k, y] \cdot [\sum_{s=1}^{n_s} E_{s,i}(x_k) - E_{i,ref}(x_k)] \quad (6)$$

$PM'(y)$  from Eq. 5 and  $PM(y)$  from Eq. 6 are equivalent if

$$PM_{ref}(y) = \sum_{j=1}^{n_j} \sum_{k=1}^{n_x} \sum_{i=1}^{n_i} A_{ij}[x_k, y] \cdot E_{i,ref}(x_k) \quad (7)$$

Using Eq. 3 this is equivalent to the condition that

$$PM_{ref}(y) = \sum_{j=1}^{n_j} \sum_{k=1}^{n_x} \sum_{i=1}^{n_i} A_{ij}[x_k, y] \frac{\Delta PM(y)}{0.2 E_{i,ref}(x_k)} E_{i,ref}(x_k) \quad (8)$$

or

$$PM_{ref}(y) = \sum_{j=1}^{n_j} \sum_{k=1}^{n_x} \sum_{i=1}^{n_i} 5 \cdot \Delta PM(y) \quad (9)$$

In other words, total  $PM_{2.5}$  will be correctly reproduced as the sum of the individual sector contributions if and only if the  $PM_{2.5}$  base concentration can be approached by 5 times the 20% perturbation response, implying a perfectly linear emission-concentration response for all precursors. Figure A1.1 shows the correspondence between regionally aggregated  $\sum_{j=1}^{n_j} \sum_{k=1}^{n_x} \sum_{i=1}^{n_i} 5 \cdot \Delta PM$  and  $PM_{ref}$ . The agreement is satisfactory although not perfect. In order to restore the closure between the total  $PM_{2.5}$  and the sum of the sectors, we therefore rescale the sector contributions such that their sum corresponds to the total  $PM_{2.5}$  obtained from the local perturbation calculation, i.e. we use the relative contribution by sector resulting from Eq. 5 and apply them onto the total  $PM_{2.5}$  obtained from Eq. 6.

$$\Delta PM_s(y) = \frac{\Delta PM'_s(y)}{\sum_{s=1}^{n_s} \Delta PM'_s(y)} PM(y) \quad (10)$$

### S1.2.2 Attribution by source region

The marginal contribution of an individual source regions ( $x$ ) to the total  $PM_{2.5}$  concentration in a given receptor region ( $y$ ) is obtained (via Eq. 2) from

$$\Delta PM'_x(y) = \sum_{j=1}^{n_j} \sum_{i=1}^{n_i} A_{ij}[x, y] \cdot E_i(x) \quad (11)$$

Similar as for the sector break-down, the emission perturbation has been replaced by an extrapolation of the SR coefficient over the total emission magnitude in a given source region, and non-linearities may lead to non-closure between the sum of all  $\Delta PM'_x(y)$  and total  $PM_{2.5}$  obtained from the local perturbation as in Eqs. (1) and (2). In order to restore the closure we apply the same scaling procedure as in Eq. 10:

$$\Delta PM_x(y) = \frac{\Delta PM'_x(y)}{\sum_{k=1}^{n_k} \Delta PM'_x(y)} PM(y) \quad (12)$$

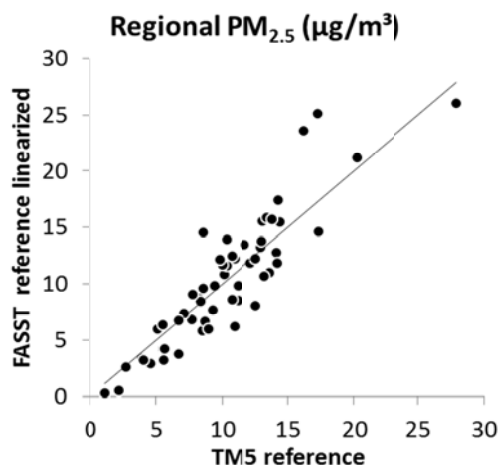

Figure S1.2 - Scatter plot of regionally aggregated  $PM_{2.5}$  concentrations. Y-axis: FASST linearized extrapolation of a 20% emission perturbation towards 100%, versus the full TM5 computation, for the FASST reference emission scenario (RCP year 2000, see Van Dingenen et al., 2018). The Figure evaluates the validity of Eq. 9.

## S2 – Within-region and extra-regional $PM_{2.5}$ concentrations

Table S2 reports the fraction of within-region vs. extra-regional  $PM_{2.5}$  concentrations for the 56 TM5-FASST regions, although it should be recognized that results are influenced by the different size of the TM5-FASST regions (e.g. European countries vs. China or India), their emissions distribution, geographical isolation of the countries (e.g. Chile has very high local contribution to air pollution just because of its geographical isolation), etc., which can affect the transboundary export efficiency as discussed in the methodological section of the manuscript. Europe, China and India are discussed in detail in the manuscript, as well as other group of countries. Here we provide some peculiar features for few additional TM5-FASST regions.  $PM_{2.5}$  concentrations in African countries are dominated by the local contributions coming from the continent itself, except for Northern Africa being affected by extra-regional transported pollution from shipping emissions and all Mediterranean countries (e.g. Italy, Spain, France). Argentina+Uruguay is the only country of Latin American being influenced by transboundary pollution, especially coming from Chile, Brazil and Rest of South America. Canada is affected for more than 50% by USA pollution, while South Eastern Asia countries are influenced by pollution of China and India (from ca 20% to 80%) depending on their location.

**Table S2 – Within-region and extra-regional PM<sub>2.5</sub> concentrations for the 56 TM5-FASST regions. The extra-regional contribution represents the RERER metric.**

| <b>Aggregated world regions</b> | <b>TM5-FASST regions</b>       | <b>within-region</b> | <b>extra-regional (RERER)</b> | <b>PM<sub>2.5</sub> concentration (µg/m<sup>3</sup>)</b> | <b>Population</b> |
|---------------------------------|--------------------------------|----------------------|-------------------------------|----------------------------------------------------------|-------------------|
| <b>Africa</b>                   | <b>Northern Africa</b>         | 44.3%                | 55.7%                         | 4.2                                                      | 7.50E+07          |
| <b>Africa</b>                   | <b>Egypt</b>                   | 61.7%                | 38.3%                         | 11.0                                                     | 6.80E+07          |
| <b>Africa</b>                   | <b>Western Africa</b>          | 76.7%                | 23.3%                         | 4.0                                                      | 2.60E+08          |
| <b>Africa</b>                   | <b>Eastern Africa</b>          | 46.8%                | 53.2%                         | 2.7                                                      | 3.00E+08          |
| <b>Africa</b>                   | <b>Southern Africa</b>         | 58.3%                | 41.7%                         | 1.0                                                      | 7.10E+07          |
| <b>Africa</b>                   | <b>Rep. of South Africa</b>    | 96.5%                | 3.5%                          | 6.1                                                      | 4.80E+07          |
| <b>China+</b>                   | <b>Mongolia+North Korea</b>    | 32.3%                | 67.7%                         | 14.6                                                     | 3.00E+07          |
| <b>China+</b>                   | <b>China</b>                   | 98.0%                | 2.0%                          | 39.9                                                     | 1.00E+09          |
| <b>Europe</b>                   | <b>Austria+Slovenia</b>        | 34.1%                | 65.9%                         | 8.4                                                      | 1.00E+07          |
| <b>Europe</b>                   | <b>Switzerland</b>             | 40.9%                | 59.1%                         | 10.1                                                     | 7.20E+06          |
| <b>Europe</b>                   | <b>Benelux</b>                 | 44.6%                | 55.4%                         | 10.1                                                     | 2.70E+07          |
| <b>Europe</b>                   | <b>Spain+Portugal</b>          | 69.4%                | 30.6%                         | 5.4                                                      | 5.10E+07          |
| <b>Europe</b>                   | <b>Finland</b>                 | 57.1%                | 42.9%                         | 2.6                                                      | 5.20E+06          |
| <b>Europe</b>                   | <b>France</b>                  | 59.5%                | 40.5%                         | 9.3                                                      | 5.90E+07          |
| <b>Europe</b>                   | <b>Great Britain+Ireland</b>   | 64.9%                | 35.1%                         | 6.1                                                      | 6.30E+07          |
| <b>Europe</b>                   | <b>Greece+Cyprus</b>           | 39.1%                | 60.9%                         | 7.6                                                      | 1.20E+07          |
| <b>Europe</b>                   | <b>Italy+Malta</b>             | 39.5%                | 60.5%                         | 11.8                                                     | 5.80E+07          |
| <b>Europe</b>                   | <b>Germany</b>                 | 51.3%                | 48.7%                         | 9.3                                                      | 8.20E+07          |
| <b>Europe</b>                   | <b>Sweden+Denmark</b>          | 35.0%                | 65.0%                         | 4.1                                                      | 1.40E+07          |
| <b>Europe</b>                   | <b>Norway</b>                  | 72.6%                | 27.4%                         | 2.4                                                      | 4.80E+06          |
| <b>Europe</b>                   | <b>Bulgaria</b>                | 36.7%                | 63.3%                         | 10.6                                                     | 8.00E+06          |
| <b>Europe</b>                   | <b>Hungary</b>                 | 25.0%                | 75.0%                         | 9.2                                                      | 1.00E+07          |
| <b>Europe</b>                   | <b>Poland+Baltic</b>           | 54.3%                | 45.7%                         | 7.9                                                      | 4.60E+07          |
| <b>Europe</b>                   | <b>Rest of Central EU</b>      | 46.5%                | 53.5%                         | 9.3                                                      | 2.30E+07          |
| <b>Europe</b>                   | <b>Czech Republic</b>          | 33.1%                | 66.9%                         | 10.3                                                     | 1.60E+07          |
| <b>Europe</b>                   | <b>Romania</b>                 | 47.3%                | 52.7%                         | 10.9                                                     | 2.20E+07          |
| <b>India+</b>                   | <b>Rest of South Asia</b>      | 50.0%                | 50.0%                         | 29.3                                                     | 3.00E+08          |
| <b>India+</b>                   | <b>India</b>                   | 86.8%                | 13.2%                         | 34.7                                                     | 1.00E+09          |
| <b>Latin America</b>            | <b>Brazil</b>                  | 91.8%                | 8.2%                          | 1.6                                                      | 2.00E+08          |
| <b>Latin America</b>            | <b>Mexico</b>                  | 80.4%                | 19.6%                         | 4.2                                                      | 1.00E+08          |
| <b>Latin America</b>            | <b>Rest of Central America</b> | 79.6%                | 20.4%                         | 2.0                                                      | 7.00E+07          |
| <b>Latin America</b>            | <b>Chile</b>                   | 98.5%                | 1.5%                          | 13.7                                                     | 2.00E+07          |
| <b>Latin America</b>            | <b>Argentina+Uruguay</b>       | 55.7%                | 44.3%                         | 1.1                                                      | 4.00E+07          |
| <b>Latin America</b>            | <b>Rest of South America</b>   | 92.4%                | 7.6%                          | 2.4                                                      | 1.00E+08          |
| <b>Middle East</b>              | <b>Turkey</b>                  | 70.1%                | 29.9%                         | 8.7                                                      | 6.30E+07          |
| <b>Middle East</b>              | <b>Middle East</b>             | 40.8%                | 59.2%                         | 9.2                                                      | 3.40E+07          |
| <b>Middle East</b>              | <b>Gulf region</b>             | 72.0%                | 28.0%                         | 7.8                                                      | 1.40E+08          |

|                      |                                   |       |       |      |          |
|----------------------|-----------------------------------|-------|-------|------|----------|
| <b>North America</b> | <b>Canada</b>                     | 44.8% | 55.2% | 4.3  | 3.00E+07 |
| <b>North America</b> | <b>USA</b>                        | 91.5% | 8.5%  | 7.8  | 3.00E+08 |
| <b>Oceania</b>       | <b>Australia</b>                  | 84.5% | 15.5% | 1.1  | 2.00E+07 |
| <b>Oceania</b>       | <b>New Zealand</b>                | 59.3% | 40.7% | 0.3  | 4.00E+06 |
| <b>Oceania</b>       | <b>Pacific Islands</b>            | 38.4% | 61.6% | 0.2  | 8.00E+06 |
| <b>Russia</b>        | <b>Kazakhstan</b>                 | 32.3% | 67.7% | 4.9  | 1.00E+07 |
| <b>Russia</b>        | <b>Former USSR Asia</b>           | 59.7% | 40.3% | 7.5  | 4.00E+07 |
| <b>Russia</b>        | <b>Russia (EU)</b>                | 50.6% | 49.4% | 3.3  | 1.00E+08 |
| <b>Russia</b>        | <b>Russia (Asia)</b>              | 44.4% | 55.6% | 2.7  | 4.00E+07 |
| <b>Russia</b>        | <b>Ukraine</b>                    | 62.0% | 38.0% | 7.8  | 6.00E+07 |
| <b>SE Asia</b>       | <b>South Korea</b>                | 30.0% | 70.0% | 13.8 | 5.00E+07 |
| <b>SE Asia</b>       | <b>Japan</b>                      | 58.7% | 41.3% | 6.9  | 1.00E+08 |
| <b>SE Asia</b>       | <b>Taiwan</b>                     | 29.0% | 71.0% | 6.4  | 2.00E+07 |
| <b>SE Asia</b>       | <b>Indonesia</b>                  | 82.9% | 17.1% | 2.4  | 2.00E+08 |
| <b>SE Asia</b>       | <b>Thailand</b>                   | 49.6% | 50.4% | 8.0  | 6.00E+07 |
| <b>SE Asia</b>       | <b>Malaysia</b>                   | 51.1% | 48.9% | 3.1  | 3.00E+07 |
| <b>SE Asia</b>       | <b>Philippines</b>                | 76.5% | 23.5% | 2.0  | 8.00E+07 |
| <b>SE Asia</b>       | <b>Vietnam</b>                    | 65.9% | 34.1% | 14.2 | 8.00E+07 |
| <b>SE Asia</b>       | <b>Rest of South Eastern Asia</b> | 16.5% | 83.5% | 8.6  | 7.00E+07 |

### S3 – Emission inventory uncertainty estimation

Table S3 summarizes region- and pollutant- specific emission uncertainties ( $\sigma_{EMI}$ ) as calculated from Eq. 4.

**Table S3 - Region- and pollutant- specific emission uncertainties ( $\sigma_{EMI}$ , %).**

| <b>TM5-FASST REGION</b> | <b>SO<sub>2</sub></b> | <b>NO<sub>x</sub></b> | <b>CO</b> | <b>NMVOC</b> | <b>NH<sub>3</sub></b> | <b>Other PM<sub>2.5</sub></b> | <b>BC</b> | <b>Primary OM</b> |
|-------------------------|-----------------------|-----------------------|-----------|--------------|-----------------------|-------------------------------|-----------|-------------------|
| Australia               | 49                    | 115                   | 156       | 135          | 298                   | 61                            | 82        | 71                |
| Austria+Slovenia        | 17                    | 20                    | 25        | 36           | 200                   | 73                            | 101       | 120               |
| Benelux                 | 19                    | 35                    | 28        | 32           | 194                   | 114                           | 103       | 158               |
| Canada                  | 53                    | 110                   | 137       | 108          | 154                   | 93                            | 113       | 166               |
| Switzerland             | 23                    | 33                    | 28        | 34           | 195                   | 44                            | 47        | 71                |
| Spain+Portugal          | 35                    | 129                   | 98        | 136          | 290                   | 69                            | 111       | 73                |
| Finland                 | 11                    | 22                    | 31        | 32           | 188                   | 106                           | 63        | 151               |
| France                  | 17                    | 36                    | 37        | 35           | 193                   | 67                            | 68        | 111               |
| Great Britain+Ireland   | 37                    | 99                    | 132       | 117          | 292                   | 77                            | 107       | 139               |
| Greece+Cyprus           | 36                    | 59                    | 97        | 136          | 289                   | 89                            | 106       | 163               |
| Italy+Malta             | 44                    | 114                   | 160       | 166          | 13                    | 50                            | 65        | 88                |
| Japan                   | 45                    | 100                   | 155       | 141          | 263                   | 186                           | 196       | 189               |



|                            |    |     |     |     |     |     |     |     |
|----------------------------|----|-----|-----|-----|-----|-----|-----|-----|
| Norway                     | 50 | 97  | 119 | 123 | 295 | 80  | 101 | 125 |
| New Zealand                | 22 | 28  | 26  | 38  | 192 | 73  | 71  | 139 |
| Germany                    | 26 | 29  | 34  | 28  | 184 | 105 | 88  | 149 |
| Sweden+Denmark             | 23 | 36  | 26  | 32  | 198 | 96  | 79  | 128 |
| Turkey                     | 27 | 25  | 31  | 39  | 188 | 63  | 57  | 108 |
| Ukraine                    | 49 | 93  | 175 | 138 | 281 | 46  | 78  | 57  |
| USA                        | 31 | 27  | 36  | 30  | 193 | 77  | 72  | 139 |
| Bulgaria                   | 48 | 122 | 110 | 108 | 284 | 115 | 111 | 162 |
| Hungary                    | 42 | 136 | 131 | 128 | 221 | 151 | 159 | 163 |
| Poland+Baltic              | 25 | 36  | 32  | 32  | 195 | 120 | 86  | 156 |
| Czech Republic             | 21 | 31  | 35  | 34  | 167 | 40  | 43  | 38  |
| Former USSR Asia           | 40 | 48  | 88  | 138 | 300 | 83  | 120 | 141 |
| Romania                    | 49 | 61  | 144 | 131 | 290 | 55  | 73  | 99  |
| Russia (Asia)              | 48 | 146 | 170 | 131 | 296 | 129 | 150 | 160 |
| Russia (EU)                | 39 | 82  | 91  | 124 | 241 | 58  | 87  | 158 |
| Argentina+Uruguay          | 45 | 92  | 160 | 136 | 232 | 53  | 83  | 103 |
| Brazil                     | 45 | 111 | 110 | 120 | 231 | 119 | 140 | 179 |
| Chile                      | 49 | 103 | 118 | 143 | 291 | 89  | 94  | 142 |
| China                      | 12 | 33  | 32  | 35  | 188 | 142 | 121 | 163 |
| South Korea                | 14 | 27  | 26  | 33  | 203 | 91  | 89  | 133 |
| Eastern Africa             | 49 | 58  | 157 | 130 | 296 | 169 | 185 | 177 |
| Egypt                      | 46 | 88  | 132 | 128 | 190 | 99  | 150 | 131 |
| Gulf region                | 47 | 98  | 143 | 107 | 287 | 127 | 111 | 160 |
| Indonesia                  | 47 | 76  | 131 | 118 | 283 | 147 | 177 | 163 |
| Kazakhstan                 | 51 | 97  | 112 | 112 | 283 | 103 | 98  | 173 |
| Middle East                | 49 | 108 | 99  | 113 | 284 | 142 | 113 | 174 |
| Mexico                     | 25 | 27  | 26  | 39  | 197 | 66  | 69  | 122 |
| Mongolia+ North Korea      | 38 | 79  | 165 | 126 | 283 | 53  | 75  | 71  |
| Malaysia                   | 51 | 90  | 137 | 116 | 273 | 121 | 137 | 181 |
| India                      | 52 | 56  | 119 | 148 | 258 | 118 | 151 | 162 |
| Northern Africa            | 36 | 124 | 167 | 125 | 295 | 102 | 125 | 127 |
| Pacific Islands            | 48 | 114 | 151 | 143 | 235 | 150 | 152 | 176 |
| Philippines                | 33 | 125 | 175 | 137 | 234 | 189 | 189 | 193 |
| Rest of Central America    | 38 | 67  | 85  | 134 | 294 | 75  | 100 | 158 |
| Rest of Central EU         | 38 | 67  | 85  | 134 | 294 | 75  | 100 | 158 |
| Rep. of South Africa       | 34 | 111 | 139 | 144 | 240 | 173 | 189 | 186 |
| Rest of South America      | 23 | 31  | 31  | 31  | 191 | 107 | 111 | 154 |
| Rest of South Asia         | 44 | 98  | 106 | 115 | 221 | 53  | 79  | 69  |
| Rest of South Eastern Asia | 42 | 78  | 141 | 115 | 292 | 94  | 129 | 173 |
| Southern Africa            | 41 | 106 | 155 | 122 | 176 | 52  | 71  | 68  |
| Thailand                   | 47 | 90  | 85  | 111 | 287 | 69  | 96  | 138 |

|                |    |     |     |     |     |     |     |     |
|----------------|----|-----|-----|-----|-----|-----|-----|-----|
| Taiwan         | 30 | 26  | 34  | 34  | 187 | 81  | 47  | 130 |
| Vietnam        | 43 | 80  | 160 | 133 | 207 | 144 | 175 | 187 |
| Western Africa | 45 | 116 | 156 | 137 | 260 | 191 | 198 | 193 |

Figure S2 represents with more regional detail the uncertainty information reported in Fig. 6 and discussed in the manuscript.

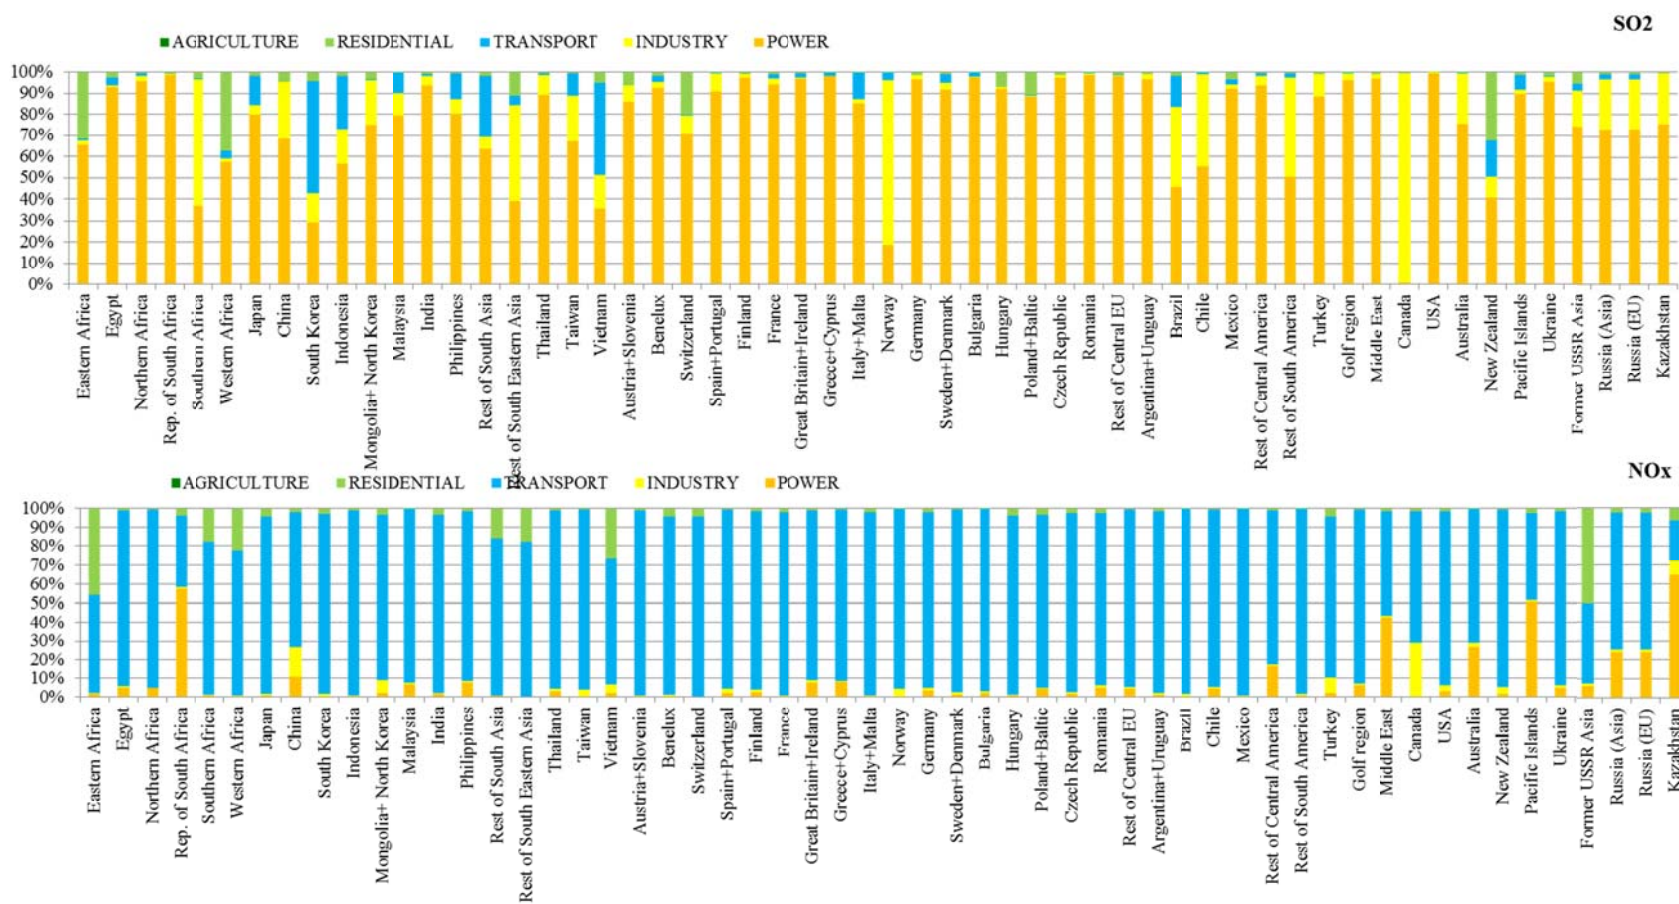

Figure S2 – Sector relative contribution to total pollutant emission uncertainty for each region.

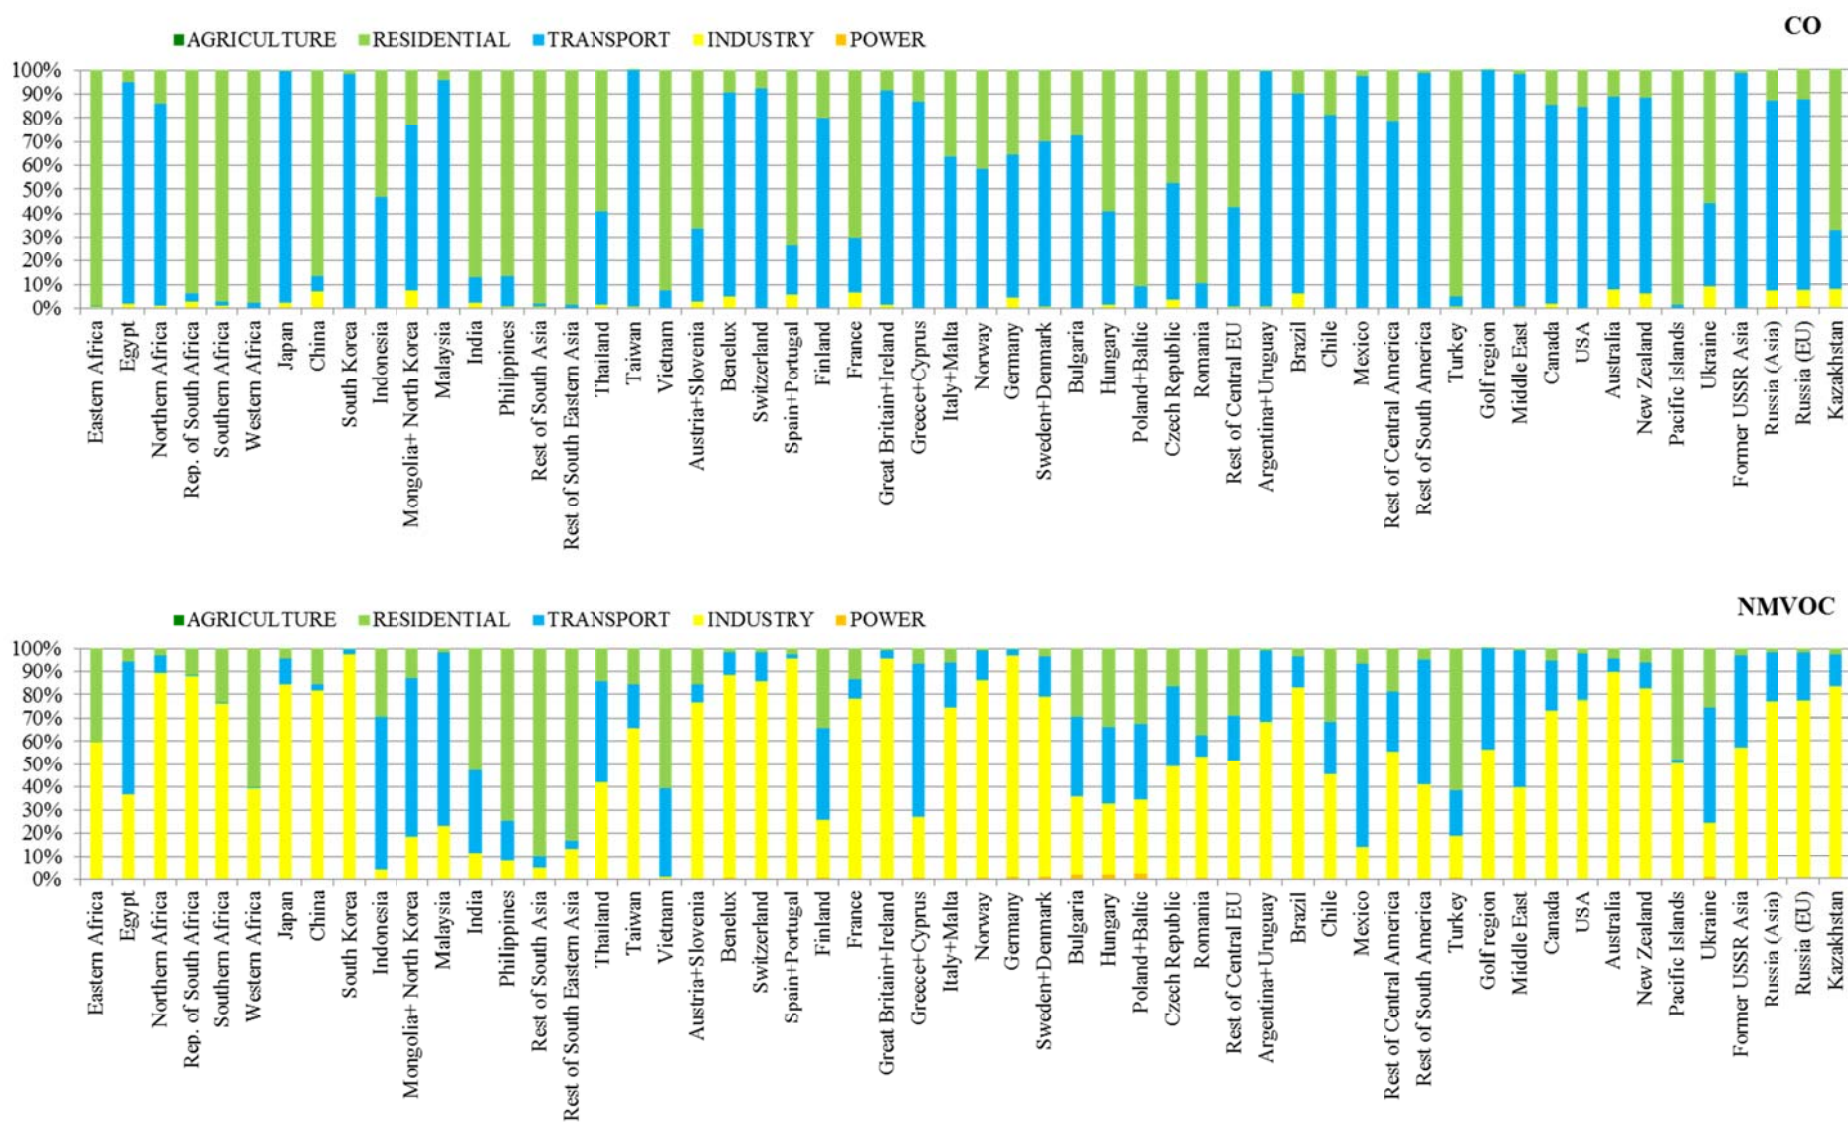

Figure S2 – Sector relative contribution to total pollutant emission uncertainty for each region.

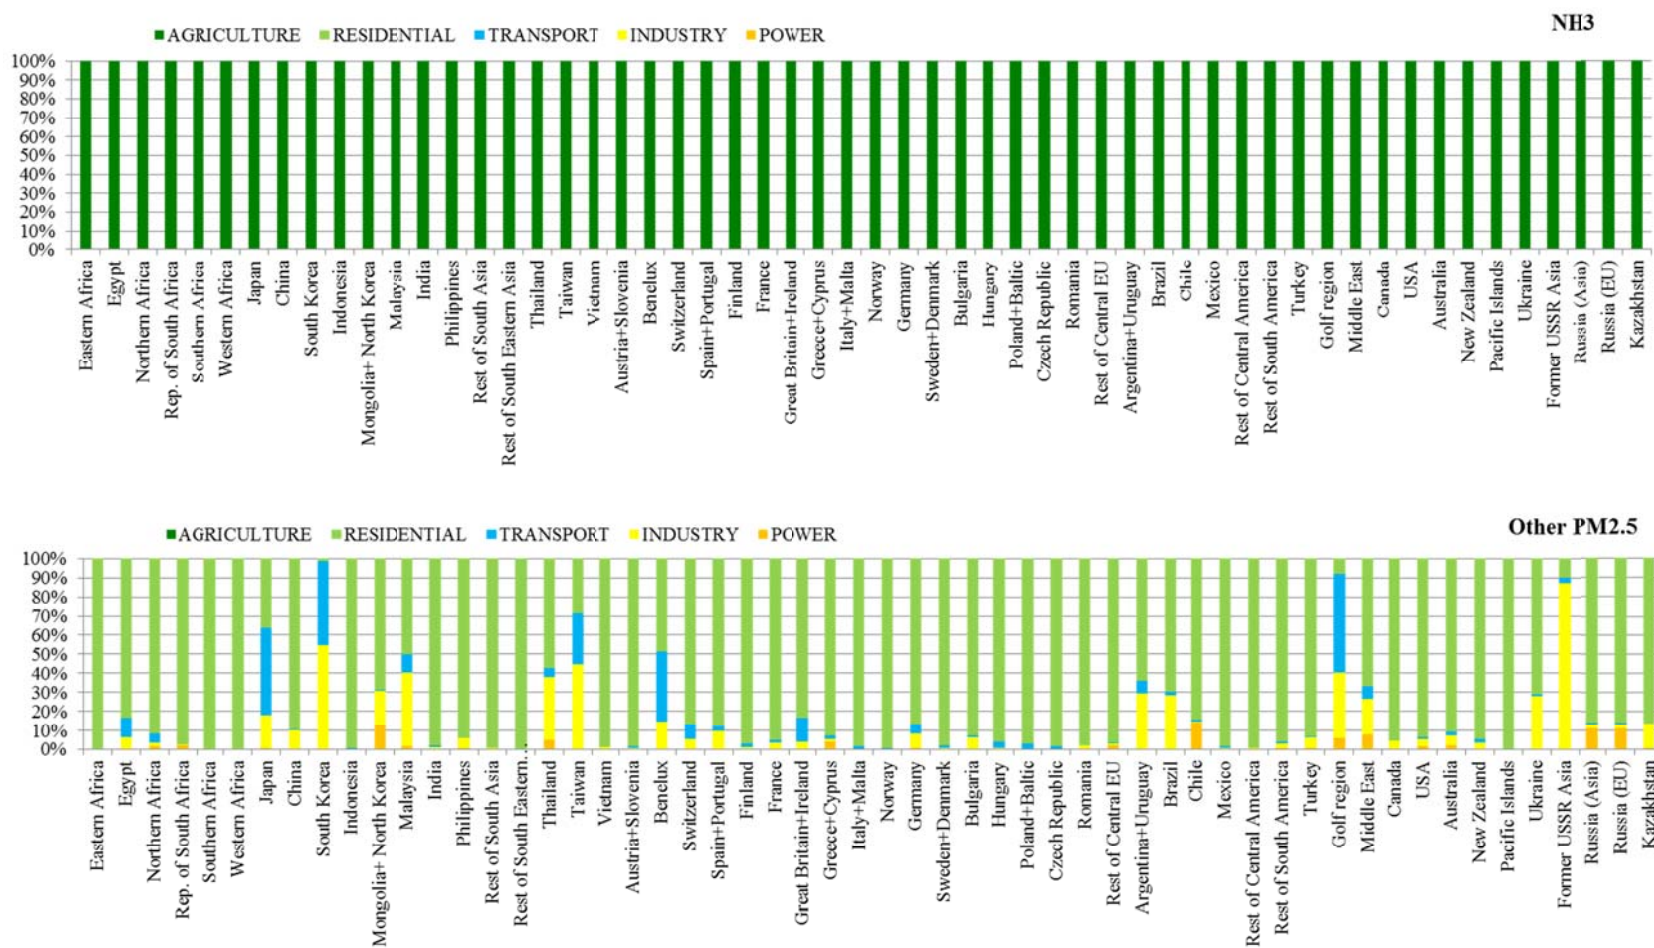

Figure S2 – Sector relative contribution to total pollutant emission uncertainty for each region.



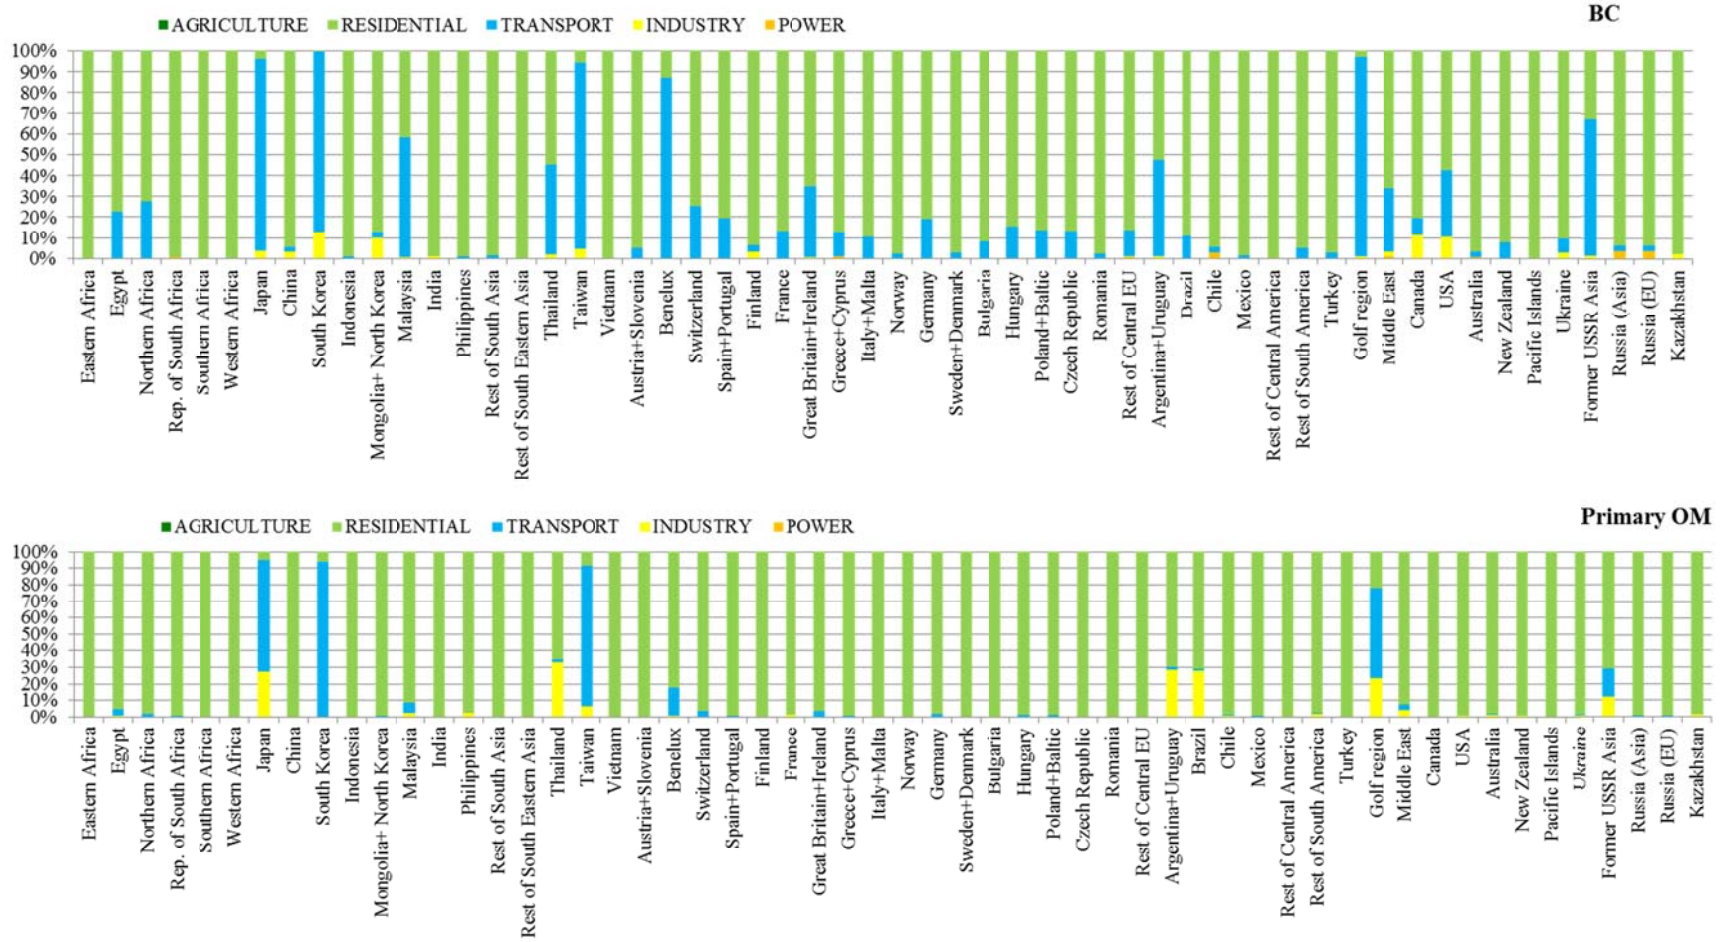

Figure S2 – Sector relative contribution to total pollutant emission uncertainty for each region.

**Table S4 – Comparison of wood consumption estimates in the residential sector (AD) in 2010: TNO RWC estimates are evaluated using per capita consumption provided by Denier van der Gon et al. (2015), while the UNFCCC estimates are derived from the 2015 reporting.**

| <b>Fuel wood use in residential sector (TJ)</b> | <b>EDGARv4.3.2</b> | <b>TNO RWC</b> | <b>UNFCCC (2015)</b> |
|-------------------------------------------------|--------------------|----------------|----------------------|
| Austria                                         | 7.0E+04            | 8.4E+04        | 8.5E+04              |
| Belgium                                         | 1.0E+04            | 9.8E+03        | 3.1E+04              |
| Bulgaria                                        | 3.0E+04            | 2.6E+04        | 3.0E+04              |
| Cyprus                                          | 8.4E+01            | 2.4E+03        | 7.0E+02              |
| Czech Republic                                  | 4.8E+04            | 4.2E+04        | 5.2E+04              |
| Germany                                         | 2.6E+05            | 1.8E+05        | 3.5E+05              |
| Denmark                                         | 4.0E+04            | 3.3E+04        | 4.5E+04              |
| Spain                                           | 1.0E+05            | 1.0E+05        | 1.1E+05              |
| Estonia                                         | 1.8E+04            | 1.4E+04        | 1.8E+04              |
| Finland                                         | 5.9E+04            | 4.9E+04        | 7.1E+04              |
| France                                          | 3.3E+05            | 3.5E+05        | 3.3E+05              |
| Great Britain                                   | 1.4E+04            | 1.6E+04        | 2.6E+04              |
| Greece                                          | 2.4E+04            | 3.4E+04        | 1.2E+04              |
| Croatia                                         | 1.3E+04            | 1.4E+04        | 1.4E+04              |
| Hungary                                         | 2.8E+04            | 2.0E+04        | 3.3E+04              |
| Ireland                                         | 1.1E+03            | 2.3E+03        | 1.8E+03              |
| Italy                                           | 1.4E+05            | 6.0E+04        | 1.8E+05              |
| Lithuania                                       | 2.4E+04            | 1.6E+04        | 2.6E+04              |
| Luxemburg                                       | 7.4E+02            | 6.1E+02        | 9.8E+02              |
| Latvia                                          | 3.1E+04            | 3.1E+04        | 3.6E+04              |
| Netherlands                                     | 1.2E+04            | 1.2E+04        | 2.4E+04              |
| Poland                                          | 1.1E+05            | 1.3E+05        | 1.4E+05              |
| Portugal                                        | 3.0E+04            | 5.3E+04        | 3.1E+04              |
| Romania                                         | 1.5E+05            | 1.1E+05        | 1.5E+05              |
| Slovakia                                        | 1.8E+03            | 2.4E+04        | 1.8E+04              |
| Slovenia                                        | 1.8E+04            | 1.3E+04        | 1.8E+04              |
| Sweden                                          | 2.6E+04            | 4.7E+04        | 5.6E+04              |
| Rep. of Macedonia                               | 7.5E+03            | 6.2E+03        | 0.0E+00              |
| Switzerland                                     | 2.0E+04            | 2.4E+04        | 2.8E+04              |
| Armenia                                         | 0.0E+00            | 8.9E+03        | 0.0E+00              |
| Arzerbaijan                                     | 3.0E+03            | 1.6E+04        | 0.0E+00              |
| Belarus                                         | 2.1E+04            | 2.7E+04        | 2.6E+04              |
| Georgia                                         | 1.3E+04            | 2.1E+04        | 0.0E+00              |
| Moldova                                         | 2.1E+03            | 6.1E+03        | 0.0E+00              |
| Russia (EU)                                     | 4.1E+04            | 4.6E+05        | 5.6E+04              |
| Ukraine                                         | 3.7E+04            | 9.1E+04        | 2.0E+04              |
| Albania                                         | 7.5E+03            | 9.3E+03        | 0.0E+00              |

|                        |         |         |         |
|------------------------|---------|---------|---------|
| Bosnia and Herzegovina | 7.5E+03 | 6.9E+03 | 0.0E+00 |
| Malta                  | 2.6E+01 | 7.4E+02 | 2.7E+01 |
| Serbia and Montenegro  | 5.9E+04 | 3.1E+04 | 0.0E+00 |
| Turkey                 | 1.9E+05 | 2.5E+05 | 1.9E+05 |
| Norway                 | 3.0E+04 | 2.8E+04 | 3.1E+04 |

Table S4 shows the comparison of wood consumption estimates in the residential sector in 2010 provided by the TNO RWC inventory (Denier van der Gon et al., 2015), EDGARv4.3.2 (Janssens-Maenhout et al., 2017, in prep.) and UNFCCC 2015. The TNO RWC estimates are evaluated using per capita consumption provided by Denier van der Gon et al. (2015), while the UNFCCC estimates are derived from the 2015 national emission inventory reporting. Note that EDGARv4.3.2 does not have information on the wood consumption in the residential sector for several countries of the Former Soviet Union (e.g. Azerbaijan, Armenia, Georgia, Moldova), but also for Albania, Bosnia Herzegovina, Serbia. Wood consumption in the residential sector is very low for Malta and Cyprus accordingly with the EDGARv4.3.2 and UNFCCC data while higher values are reported by Denier van der Gon et al. (2015). In addition the wood consumption in Russia estimated using the per capita information provided by Denier van der Gon et al. (2015) is 11 times higher compared to the activity data available in EDGARv4.3.2 and UNFCCC. Being one of the world top producers of crude oil and natural gas, the wood consumption in Russia for the residential sector is estimated to be quite low in particular in urban regions due to the use of district heating and natural gas in the household sector in this region, as reported by Nejat et al. (2015).

**Table S5 – Uncertainty of the residential emissions for each pollutant and region including the uncertainty of wood consumption in the household sector in the European domain (TNO RWC vs. EDGARv4.3.2).**

| pollutant         | $\sigma_{EMI, RES, bio}$ (Annex I countries) | $\sigma_{EMI, RES, bio}$ (non Annex-I & EIT) |
|-------------------|----------------------------------------------|----------------------------------------------|
| SO <sub>2</sub>   | 63%                                          | 80%                                          |
| NO <sub>x</sub>   | 107%                                         | 155%                                         |
| CO                | 107%                                         | 155%                                         |
| NM VOC            | 107%                                         | 155%                                         |
| CH <sub>4</sub>   | 204%                                         | 302%                                         |
| NH <sub>3</sub>   | 204%                                         | 302%                                         |
| PM <sub>10</sub>  | 204%                                         | 302%                                         |
| PM <sub>2.5</sub> | 204%                                         | 302%                                         |
| BC                | 204%                                         | 302%                                         |
| OC                | 204%                                         | 302%                                         |

Emission uncertainties are calculated following the methodology described in Sect. 3.4.3 through the comparison of the TNO RWC wood consumption estimates and the corresponding EDGARv4.3.2 data (refer to Table S5) and through the comparison of the TNO RWC wood consumption estimates with the UNFCCC 2015 reports for the year 2010 (refer to Table S6).



**Table S6 – Uncertainty of the residential emissions for each pollutant and region including the uncertainty of wood consumption in the household sector in the European domain (TNO RWC vs. UNFCCC).**

| pollutant         | $\sigma_{\text{EMI,RES bio (Annex I countries)}}$ | $\sigma_{\text{EMI,RES bio (non Annex-I \& EIT)}}$ |
|-------------------|---------------------------------------------------|----------------------------------------------------|
| SO <sub>2</sub>   | 78%                                               | 92%                                                |
| NO <sub>x</sub>   | 116%                                              | 161%                                               |
| CO                | 116%                                              | 161%                                               |
| NM <sub>VOC</sub> | 116%                                              | 161%                                               |
| CH <sub>4</sub>   | 209%                                              | 306%                                               |
| NH <sub>3</sub>   | 209%                                              | 306%                                               |
| PM <sub>10</sub>  | 209%                                              | 306%                                               |
| PM <sub>2.5</sub> | 209%                                              | 306%                                               |
| BC                | 209%                                              | 306%                                               |
| OC                | 209%                                              | 306%                                               |

## References

Denier Van Der Gon, H., Bergström, R., Fountoukis, C., Johansson, C., Pandis, S., Simpson, D., and Visschedijk, A.: Particulate emissions from residential wood combustion in Europe—revised estimates and an evaluation, *Atmospheric Chemistry and Physics*, 15, 6503-6519, 2015.

Eickhout, B., Den Elzen, M. G. J. and Kreileman, G. J. J.: The Atmosphere-Ocean System of IMAGE 2.2. A global model approach for atmospheric concentrations, and climate and sea level projections, RIVM, Bilthoven, The Netherlands. Available from: <http://rivm.openrepository.com/rivm/handle/10029/8936> (Accessed 10 January 2017), 2004.

Höglund-Isaksson, L. and Mechler, R.: The GAINS model for greenhouse gases-version 1.0: Methane (CH<sub>4</sub>), IIASA Interim Report, International Institute for Applied Systems Analysis, Laxenburg, Austria. [online] Available from: <http://pure.iiasa.ac.at/7784/> (Accessed 10 January 2017), 2005.

Nejat, P., Jomehzadeh, F., Taheri, M. M., Gohari, M., and Majid, M. Z. A.: A global review of energy consumption, CO<sub>2</sub> emissions and policy in the residential sector (with an overview of the top ten CO<sub>2</sub> emitting countries), *Renewable and sustainable energy reviews*, 43, 843-862, 2015.

Riahi, K., Grübler, A. and Nakicenovic, N.: Scenarios of long-term socio-economic and environmental development under climate stabilization, *Technol. Forecast. Soc. Change*, 74(7), 887–935, doi:10.1016/j.techfore.2006.05.026, 2007.

Russ, P., Wiesenenthal, T., Van Regemorter, D. and Ciscar, J.: Global Climate Policy Scenarios for 2030 and beyond. Analysis of Greenhouse Gas Emission Reduction Pathway Scenarios with the POLES and GEM-E3 models., European Commission, Joint Research Centre, IPTS, Seville, Spain., 2007.

Van Aardenne, J., Dentener, F., Van Dingenen, R., Maenhout, G., Marmer, E., Vignati, E., Russ, P., Szabo, L. and Raes, F.: Climate and air quality impacts of combined climate change and air pollution policy scenarios, JRC Scientific and Technical Reports, Ispra, Italy, 2007.

Van Dingenen, R., Dentener, F., Crippa, M., Leitao, J., Marmer, E., Rao, S., Solazzo, E., and Valentini, L.: TM5-FASST: a global atmospheric source–receptor model for rapid impact analysis of emission changes on air quality and short-lived climate pollutants, *Atmos. Chem. Phys.*, 18, 16173–16211, 10.5194/acp-18-16173-2018, 2018.

van Vuuren, D. P., Elzen, M. G. J. den, Lucas, P. L., Eickhout, B., Strengers, B. J., Ruijven, B. van, Wonink, S. and Houdt, R. van: Stabilizing greenhouse gas concentrations at low levels: an assessment of reduction strategies and costs, *Clim. Change*, 81(2), 119–159, doi:10.1007/s10584-006-9172-9, 2007.
